# Supplementary material
Source: Springer Nature journal article supplement (https://www.springermedizin.de/resource/supplementary/12911_2011_444_MOESM2_ESM.pdf/9525740)

# RELIABILITY DIAGRAM

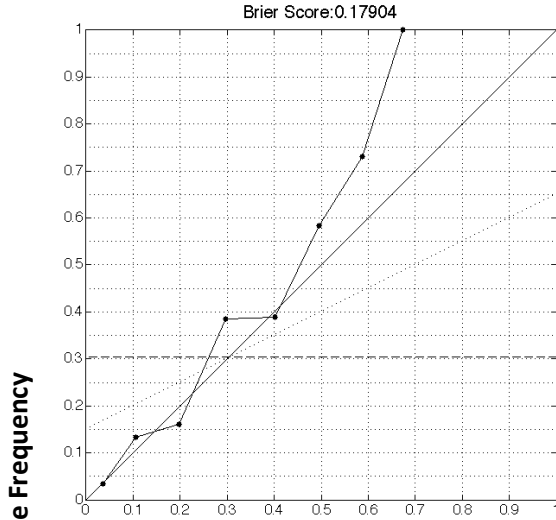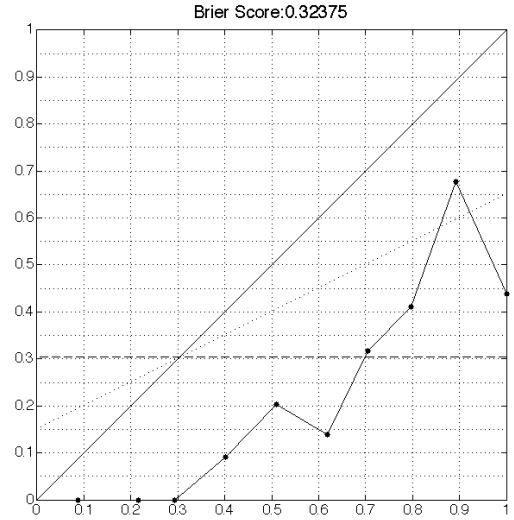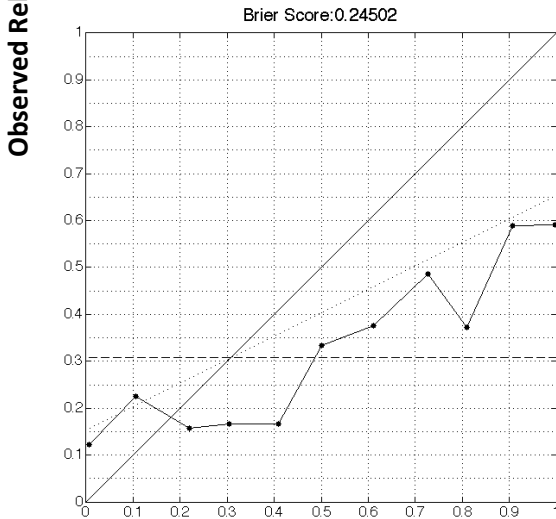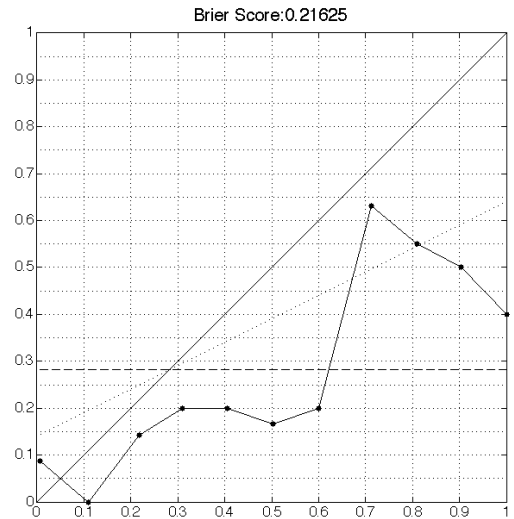

Predicted Probability

Supplement: MOESM2 [file 9525740]
